# Supplementary material
Source: PubMed Central journal article supplement (PMC6856324)
Supplement: AEM.01742-19-s0001.pdf [file AEM.01742-19-s0001.pdf]

# Interspecies and Intraspecies Signals Synergistically Regulate the Twitching Motility in *Lysobacter enzymogenes*

**Running title: Regulation of *L. enzymogenes* twitching motility**

Tao Feng<sup>1,2,7</sup>, Yong Han<sup>3,4,7</sup>, Bingqing Li<sup>5,7</sup>, Zhiqiang Li<sup>6,7</sup>, Yameng Yu<sup>1</sup>, Qingyang Sun<sup>1</sup>,  
Xiaoyu Li<sup>1</sup>, Liangcheng Du<sup>3</sup>, Xiao-Hua Zhang<sup>1,2</sup>, Yan Wang<sup>1,2\*</sup>

1. College of Marine Life Sciences, MOE Key Laboratory of Marine Genetics and Breeding, Ocean University of China, Qingdao, 266003, China
2. Laboratory for Marine Ecology and Environmental Science, Qingdao National Laboratory for Marine Science and Technology, Qingdao, 266071, China
3. Department of Chemistry, University of Nebraska-Lincoln, NE68588, USA
4. Edison biotechnology institute, Ohio University, Athens, OH45701, USA
5. Department of Microbiology, Institute of Basic Medicine, Shandong Academy of Medical Sciences, Jinan, 250062, China
6. Center for Optics Research and Engineering (CORE), Shandong University, Qingdao, 266237, China
7. These authors contributed equally

\*Correspondence: [wangy12@ouc.edu.cn](mailto:wangy12@ouc.edu.cn)

**The authors declare no conflict of interest.**

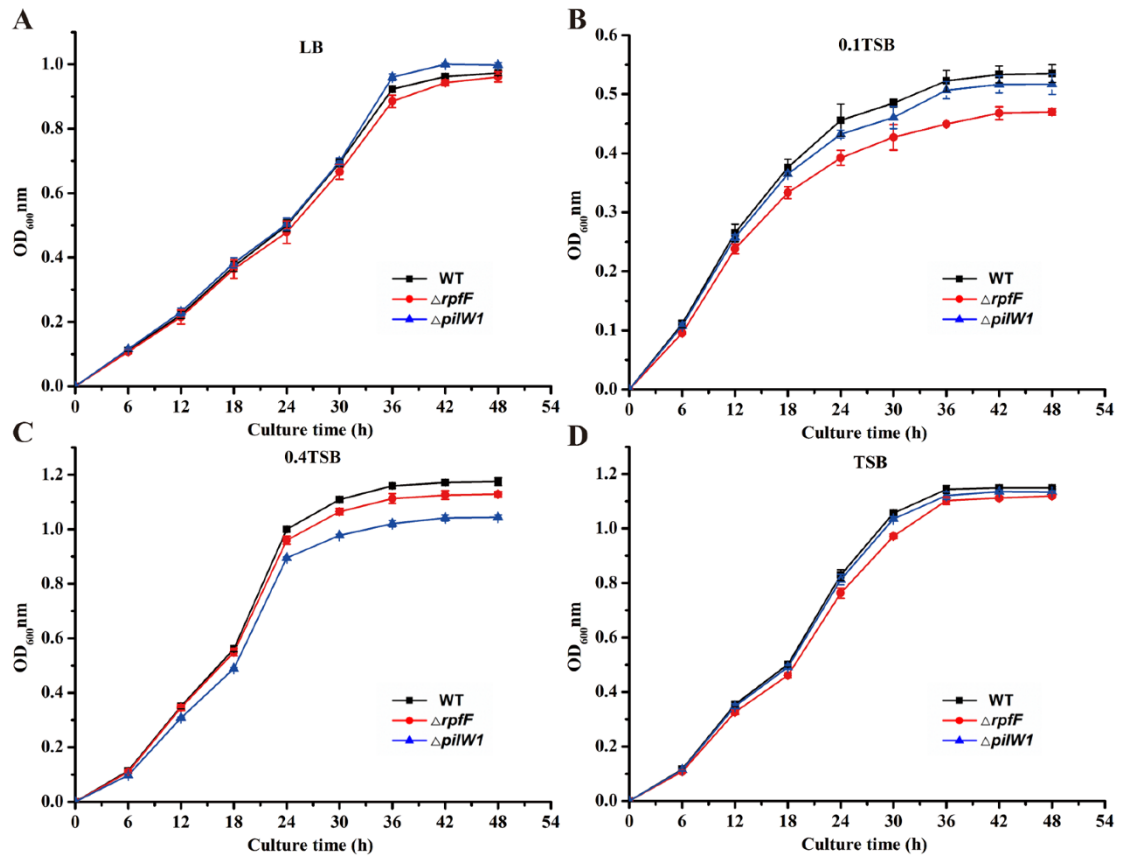

**Figure S1.  $OD_{600}$  analysis of the wild-type strain,  $\Delta rpfF$  and  $\Delta pilW1$  mutant in LB, 0.1 TSB, 0.4 TSB and TSB media.** (A) Grown of wild-type strain,  $\Delta rpfF$  and  $\Delta pilW1$  mutants in LB medium. (B) Grown of wild-type strain,  $\Delta rpfF$  and  $\Delta pilW1$  mutants in 0.1 TSB medium. (C) Grown of wild-type strain,  $\Delta rpfF$  and  $\Delta pilW1$  mutants in 0.4 TSB medium. (D) Grown of wild-type strain,  $\Delta rpfF$  and  $\Delta pilW1$  mutants in TSB medium. The results are representative of biological duplicates. The error bars represent the standard deviations of at least three replicat.

**Table S1. Gene information and GeneBank accession numbers of Tfp assembly system of *L. enzymogenes* YC36**

| Gene name               | GenBank accession number | Gene name                | GenBank accession number |
|-------------------------|--------------------------|--------------------------|--------------------------|
| <i>pilM</i>             | MK967244                 | <i>pilE<sub>2</sub></i>  | MK967260                 |
| <i>pilN</i>             | MK967245                 | <i>pilY1<sub>2</sub></i> | MK967261                 |
| <i>pilO</i>             | MK967246                 | <i>pilX<sub>2</sub></i>  | MK967262                 |
| <i>pilP</i>             | MK967247                 | <i>pilW<sub>2</sub></i>  | MK967263                 |
| <i>pilQ</i>             | MK967248                 | <i>pilV<sub>2</sub></i>  | MK967264                 |
| <i>pilT</i>             | MK967249                 | <i>fimT<sub>2</sub></i>  | MK967265                 |
| <i>pilT<sub>2</sub></i> | MK967250                 | <i>fimU<sub>2</sub></i>  | MK967266                 |
| <i>pilZ</i>             | MK967251                 | <i>pilJ</i>              | MK967267                 |
| <i>pilH<sub>2</sub></i> | MK967252                 | <i>pilI</i>              | MK967268                 |
| <i>pilF</i>             | MK967253                 | <i>PilH</i>              | MK967269                 |
| <i>pilE</i>             | MK967254                 | <i>pilG</i>              | MK967270                 |
| <i>pilY1</i>            | MK967255                 | <i>pilS</i>              | MK967271                 |
| <i>pilX</i>             | MK967256                 | <i>pilR</i>              | MK967272                 |
| <i>pilW</i>             | MK967257                 | <i>pilA</i>              | MK967273                 |
| <i>pilV</i>             | MK967258                 | <i>pilB</i>              | MK967274                 |
| <i>fimT</i>             | MK967259                 | <i>pilC</i>              | MK967275                 |
|                         |                          | <i>pilS<sub>2</sub></i>  | MK967276                 |

All GenBank entries in the table S3 represent the corresponding accession numbers for the genes in Tfp assembly system of the *L. enzymogenes* YC36.
